# Supplementary material
Source: publisher figshare collection journal article supplement (https://frontiersin.figshare.com/ndownloader/files/29146098)
Supplement: Supplementary file [file 29146098]

# Supplementary Information: A Bayesian Model to Analyze the Association of Rheumatoid Arthritis with Risk Factors and Their Interactions

LEON LUFKIN<sup>1</sup>, MARKO BUDIŠIĆ<sup>2</sup>, SUMONA MONDAL<sup>2</sup>, AND SHANTANU SUR<sup>3,\*</sup>

<sup>1</sup>*The Clarkson School, Clarkson University, Potsdam, NY 13699, US*

<sup>2</sup>*Department of Mathematics, Clarkson University, Potsdam, NY 13699, US*

<sup>3</sup>*Department of Biology, Clarkson University, Potsdam, NY 13699, US*

*\*Correspondence: [ssur@clarkson.edu](mailto:ssur@clarkson.edu)*

## 1. SUPPLEMENTARY TABLES

|                               | RA Prevalence | Proportion Male |              | RA Female-Male Ratio |
|-------------------------------|---------------|-----------------|--------------|----------------------|
|                               |               | RA              | No Arthritis |                      |
| Literature reported           | ~0.5–1%       | ~25%            | ~50%         | ~2–3                 |
| NHANES (before preprocessing) | 3.01%         | 39.3%           | 49.6%        | 1.54                 |
| NHANES (after preprocessing)  | 6.55%         | 41.5%           | 52.7%        | 1.41                 |

**Table S1.** RA prevalence, proportions of males in RA and no arthritis population, and female to male ratio in RA population are compared between literature reported values and NHANES data (before and after preprocessing).

| Study                | Dataset | Risk Factors                              | RA Type                  | AUC   |
|----------------------|---------|-------------------------------------------|--------------------------|-------|
| Karlson, et. al. [1] | NHS*    | Age, sex, geographic region, smoking      | Seropositive             | 0.566 |
| Karlson, et. al. [1] | EIRA    | Age, sex, geographic region, smoking      | Seropositive             | 0.626 |
| Karlson, et. al. [1] | NHS     | Age, sex, smoking + 8 HLA, 14 SNP alleles | Seropositive             | 0.660 |
| Karlson, et. al. [1] | EIRA    | Age, sex, smoking + 8 HLA, 14 SNP alleles | Seropositive             | 0.752 |
| Chibnik, et. al. [2] | NHS     | GRS, age, smoking                         | Seronegative             | 0.563 |
| Chibnik, et. al. [2] | NHS     | GRS, age, smoking                         | Seropositive             | 0.654 |
| Chibnik, et. al. [2] | NHS     | GRS, age, smoking                         | Erosive and seropositive | 0.644 |
| Chibnik, et. al. [2] | NHS     | GRS, age, smoking                         | Erosive                  | 0.712 |
| Karlson, et. al. [3] | NHS     | Age, smoking, alcohol, education, parity  | Seropositive             | 0.655 |
| Karlson, et. al. [3] | EIRA    | Age, smoking, alcohol, education, parity  | Seropositive & female†   | 0.632 |
| Karlson, et. al. [3] | EIRA    | Age, smoking, alcohol, education          | Seropositive & male      | 0.685 |
| This study           | NHANES  | Age, smoking                              | Self-reported            | 0.748 |
| This study           | NHANES  | Age, sex, smoking                         | Self-reported            | 0.772 |

**Table S2.** Comparison of predictive ability of current study against from previous works. Abbreviations: NHS, US Nurses' Health Studies I & II; EIRA, Swedish Epidemiologic Investigation of RA; GRS, Genetic Risk Score. \*All prediction using NHS was only performed on females. †"female" indicates prediction was only performed on female subjects; "male" indicates prediction was only performed on male subjects.

## 2. SUPPLEMENTARY FIGURE

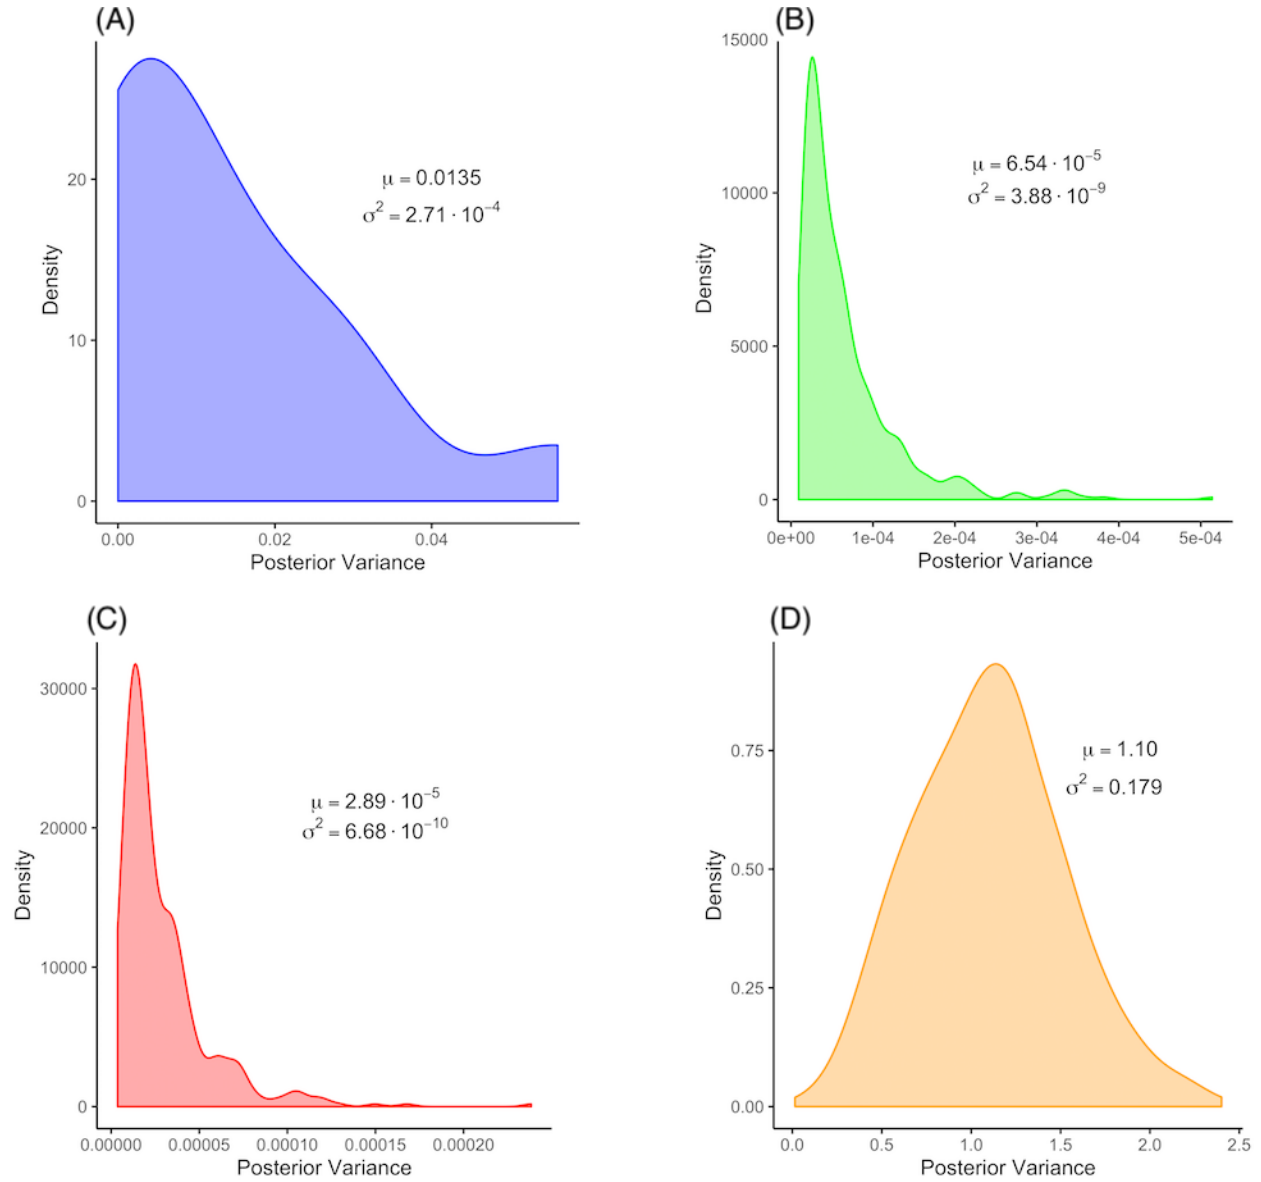

**Figure S1.** Distributions of posterior variances of estimated regression coefficients from four Bayesian approaches used to predict RA with the training dataset; mean and variance of distributions are shown. (a) Regression model using only the 14 first-order variables. (b) Estimates for all 489 variables using regression coefficients derived from 52 synthetic variables after FAMD. (c) Estimates for all 489 variables using regression coefficients derived from 33 synthetic variables selected by GA. (d) regression model using all 489 variables without FAMD.

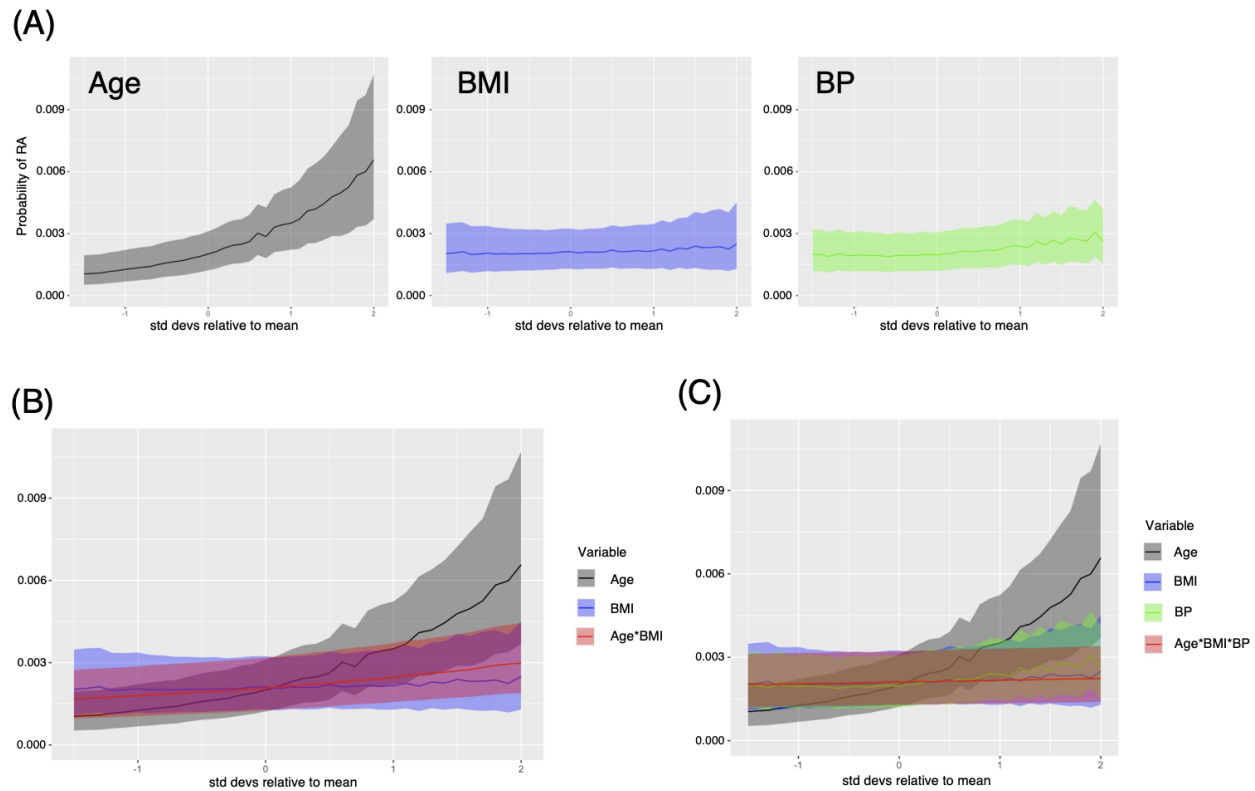

**Figure S2.** Marginal effects plots of (A) first-order variables age, BMI, and BP, (B) second-order interaction of age and BMI, and (C) third-order interaction of age, BMI, and BP, with first-order effects overlaid for comparison.

## REFERENCES

1. E. W. Karlson, L. B. Chibnik, P. Kraft, J. Cui, B. T. Keenan, B. Ding, S. Raychaudhuri, L. Klareskog, L. Alfredsson, and R. M. Plenge, "Cumulative association of 22 genetic variants with seropositive rheumatoid arthritis risk," *Annals rheumatic diseases* **69**, 1077–1085 (2010).
2. L. B. Chibnik, B. T. Keenan, J. Cui, K. P. Liao, K. H. Costenbader, R. M. Plenge, and E. W. Karlson, "Genetic risk score predicting risk of rheumatoid arthritis phenotypes and age of symptom onset," *PloS one* **6**, e24380 (2011).
3. E. W. Karlson, B. Ding, B. T. Keenan, K. Liao, K. H. Costenbader, L. Klareskog, L. Alfredsson, and L. B. Chibnik, "Association of environmental and genetic factors and gene–environment interactions with risk of developing rheumatoid arthritis," *Arthritis care & research* **65**, 1147–1156 (2013).
